# Supplementary material for: Impact of support characteristics and preparation method on photocatalytic activity of TiO2/ZSM-5/silica gel composite photocatalyst
Source: R Soc Open Sci. 2018 Sep 19;5(9):180918. doi: 10.1098/rsos.180918 (PMC6170579; doi:10.1098/rsos.180918)
Supplement: Data [file rsos180918supp1.xlsx]

## Sheet: Abbreviations
Code		Components																		Preparation method
Degussa P25		Commercial TiO2-P25 powder provided by Degussa
PZS		Composite photocatalyst prepared using Degussa P25, ZSM-5 SiO2/Al2O3 = 280, and silica gel with particle size 0.2–0.5 mm and pore size 40Å.																		These composite photocatalysts were prepared by the same method
PZ23S		Composite photocatalyst prepared using Degussa P25, ZSM-5 SiO2/Al2O3 = 23, and silica gel with particle size 0.2–0.5 mm and pore size 40Å.
PZS60Å		Composite photocatalyst prepared using Degussa P25, ZSM-5 SiO2/Al2O3 = 280, and silica gel with particle size 0.2–0.5 mm and pore size 60Å.
PZS40-60 µm		Composite photocatalyst prepared using Degussa P25, ZSM-5 SiO2/Al2O3 = 280, and silica gel with particle size 40–60 µm and pore size 40Å.
PZSB		Composite photocatalyst prepared using Degussa P25, ZSM-5 SiO2/Al2O3 = 280, silica gel with particle size 0.2–0.5 mm and pore size 40Å, and colloidal silica gel binder.																		This composite photocatalysts was prepared by different method

## Sheet: Degussa P25
Photolysis
Time (min)	Conc. (mg/L)		Average
0	46.59	45.3	45.945
15	46.48	46	46.24
30	45.7	46	45.85
60	46.69	46.92	46.805
90	46.4	46.2	46.3
105	45	46	45.5
120	46.17	45.96	46.065
Degussa P25
Time (min)	0.3 g/L
	Conc. (mg/L)		Average	% Remining	ln(C/Co)
-45	49.56	49.58	49.57	100
-15	48.16	48	48.08	96.9941
0	47.74	48.18	47.96	96.7521	0
15	42.05	41.64	41.845	84.416	-0.136395
30	36.74	37.12	36.93	74.5007	-0.261343
60	30.19	30.9	30.545	61.6199	-0.451166
90	25.23	25.27	25.25	50.9381	-0.641541
105	22.52	22.42	22.47	45.3298	-0.758186
120	19.82	19.77	19.795	39.9334	-0.884938
Time (min)	0.7 g/L
	Conc		Average	% Remining	ln(C/Co)
-45	48.71	48.18	48.445	100
-15	47.59	47.81	47.7	98.4622
0	46.6	46.45	46.525	96.0367	0
15	37.92	38.43	38.175	78.8007	-0.197809
30	34.29	34.77	34.53	71.2767	-0.298161
45	30.11	29.78	29.945	61.8124	-0.440627
60	25.84	26.71	26.275	54.2368	-0.571372
75	21.95	21.96	21.955	45.3194	-0.750995
90	18.85	18.55	18.7	38.6005	-0.911466
105	15.17	15.13	15.15	31.2726	-1.12199
120	11.57	11.78	11.675	24.0995	-1.38254

## Sheet: PZS
P25 loading
Time (min)	0.1 g/L					0.3 g/L					0.5 g/L					0.7 g/L
	Conc. (mg/L)		Average	% Remining	ln(C/Co)	Conc. (mg/L)		Average	% Remining	ln(C/Co)	Conc. (mg/L)		Average	% Remining	ln(C/Co)	Conc. (mg/L)		Average	% Remining	ln(C/Co)
-30	49.89	50.02	49.955	100		49.89	50.02	49.955	100		49.89	50.02	49.955	100		49.89	50.02	49.955	100
0	41.61	41.54	41.575	83.2249	0	42.41	42.08	42.245	84.5661	0	42.13	42.4	42.265	84.6061	0	42.99	41.14	42.065	84.2058	0
15	36.96	37.16	37.06	74.1868	-0.114961	33.52	33.56	33.54	67.1404	-0.230747	36.77	36.84	36.805	73.6763	-0.138326	37.51	37.27	37.39	74.8474	-0.117813
30	34.15	34.39	34.27	68.6017	-0.193229	29.97	30.26	30.115	60.2843	-0.338463	33.29	33.92	33.605	67.2705	-0.229284	33.96	34.11	34.035	68.1313	-0.211827
60	29.87	30.05	29.96	59.974	-0.327636	23.58	23.53	23.555	47.1524	-0.584148	28.2	28.35	28.275	56.6009	-0.401981	29.06	28.72	28.89	57.832	-0.375721
90	27.24	26.97	27.105	54.2588	-0.427781	20.13	20.18	20.155	40.3463	-0.740034	23.46	23.26	23.36	46.7621	-0.592934	23.7	23.86	23.78	47.6028	-0.570371
105	23.68	23.73	23.705	47.4527	-0.561813	17.64	17.67	17.655	35.3418	-0.872467	21.19	21.19	21.19	42.4182	-0.69043	22.61	22.35	22.48	45.0005	-0.62659
120	24.11	23.57	23.84	47.723	-0.556134	15.9	15.91	15.905	31.8387	-0.976852	19.08	18.96	19.02	38.0743	-0.798468	19.82	19.37	19.595	39.2253	-0.763942
ZSM loading
Time (min)	0.1 g/L					0.3 g/L					0.5 g/L					0.7 g/L					0.9 g/L
	Conc. (mg/L)		Average	% Remining	ln(C/Co)	Conc. (mg/L)		Average	% Remining	ln(C/Co)	Conc. (mg/L)		Average	% Remining	ln(C/Co)	Conc. (mg/L)		Average	% Remining	ln(C/Co)	Conc. (mg/L)		Average	% Remining	ln(C/Co)
-45	46.8	47.96	47.38	100		49.64	49.77	49.705	100		49.64	49.77	49.705	100		49.64	49.77	49.705	100		49.64	49.77	49.705	100
-15	44.56	44.78	44.67	94.2803		45.59	43.79	44.69	89.9105		41.58	43.22	42.4	85.3033		40.88	40.8	40.84	82.1648		38.41	38.06	38.235	76.9239
0	44.72	44.81	44.765	94.4808	0	44.39	44.41	44.4	89.327	0	42.08	42.48	42.28	85.0619	0	40.79	41.66	41.225	82.9393	0	38.25	38.61	38.43	77.3162	0
15	39.54	41.41	40.475	85.4263	-0.100742	39.36	38.96	39.16	78.7848	-0.125584	36.04	36.57	36.305	73.0409	-0.152359	36.23	35.88	36.055	72.538	-0.133999	32.71	32.32	32.515	65.416	-0.167137
30	37.96	38.46	38.21	80.6458	-0.158329	35.94	36.13	36.035	72.4977	-0.208749	32.37	32.59	32.48	65.3455	-0.26369	32.36	32.69	32.525	65.4361	-0.237036	28.68	28.06	28.37	57.0768	-0.303506
60	33.06	33.49	33.275	70.2301	-0.29662	30.18	29.98	30.08	60.5171	-0.389379	24.62	24.86	24.74	49.7737	-0.535893	27.66	27.69	27.675	55.6785	-0.398515	23.51	23.49	23.5	47.2789	-0.491838
90	28.36	28.09	28.225	59.5715	-0.461218	25.29	25.42	25.355	51.011	-0.560264	21.67	21.54	21.605	43.4665	-0.671389	22.98	22.82	22.9	46.0718	-0.587908	19.5	19.86	19.68	39.5936	-0.669236
105	26.84	27.01	26.925	56.8278	-0.508371	22.88	23.05	22.965	46.2026	-0.659268	19.18	19.17	19.175	38.5776	-0.790707	20.62	20.87	20.745	41.7362	-0.68674	17.83	17.87	17.85	35.9119	-0.766835
120	25.56	25.3	25.43	53.6724	-0.565497	20.73	20.37	20.55	41.3439	-0.770379	16.55	16.62	16.585	33.3669	-0.935815	18.77	18.65	18.71	37.6421	-0.789987	15.75	15.35	15.55	31.2846	-0.904778
Silica gel loading
Time (min)	0.3 g/L					0.5 g/L					0.7 g/L					0.9 g/L
	Conc. (mg/L)		Average	% Remining	ln(C/Co)	Conc. (mg/L)		Average	% Remining	ln(C/Co)	Conc. (mg/L)		Average	% Remining	ln(C/Co)	Conc. (mg/L)		Average	% Remining	ln(C/Co)
-30	49.56	49.58	49.57	100		49.89	50.02	49.955	100		49.56	49.58	49.57	100		49.35	49.67	49.51	100
0	41.53	41.87	41.7	84.1235	0	42.41	42.08	42.245	84.5661	0	42.2	42.27	42.235	85.2027	0	42.63	43.72	43.175	87.2046	0
15	37.25	37.22	37.235	75.116	-0.113252	33.52	33.56	33.54	67.1404	-0.230747	36.85	36.77	36.81	74.2586	-0.13748	37.89	37.58	37.735	76.2169	-0.134674
30	34.83	34.92	34.875	70.3551	-0.178731	29.97	30.26	30.115	60.2843	-0.338463	34.67	34.36	34.515	69.6288	-0.201855	34.33	34.1	34.215	69.1073	-0.232597
60	30.38	30.51	30.445	61.4182	-0.314579	23.58	23.53	23.555	47.1524	-0.584148	28.91	28.84	28.875	58.251	-0.380273	28.98	28.81	28.895	58.3619	-0.401593
90	26.25	26.49	26.37	53.1975	-0.458274	20.13	20.18	20.155	40.3463	-0.740034	24.44	24.56	24.5	49.4251	-0.544576	23.61	24.05	23.83	48.1317	-0.594316
105	24.36	24.08	24.22	48.8602	-0.543322	17.64	17.67	17.655	35.3418	-0.872467	22.18	22.91	22.545	45.4811	-0.627736	21.82	22.13	21.975	44.385	-0.675356
120	22.16	22.4	22.28	44.9465	-0.626812	15.9	15.91	15.905	31.8387	-0.976852	21.22	21.23	21.225	42.8182	-0.68807	20.15	19.85	20	40.3959	-0.769529
Optimum		0.3P:0.5Z:0.5S
Time (min)	Conc. (mg/L)		Average	% Remining	ln(C/Co)	C/Co
-45	48.66	49.23	48.945	100
-15	43	42.99	42.995	87.8435
0	43.16	42.91	43.035	87.9252	0	1
5	38.33	38.58	38.455	78.5678	-0.112525	0.893575
10	35.15	35.58	35.365	72.2546	-0.196291	0.821773
20	31.31	31.05	31.18	63.7042	-0.322237	0.724527
30	29.85	29.21	29.53	60.333	-0.376607	0.686186
40	27.98	27.37	27.675	56.5431	-0.441484	0.643081
50	25.22	25.61	25.415	51.9256	-0.526674	0.590566
60	23.52	23.62	23.57	48.1561	-0.602039	0.547694
70	21.99	22.76	22.375	45.7146	-0.654069	0.519926
80	21.05	21.02	21.035	42.9768	-0.715826	0.488788
90	20.12	19.76	19.94	40.7396	-0.769286	0.463344
100	18.62	18.35	18.485	37.7669	-0.845054	0.429534
110	16.76	16.71	16.735	34.1914	-0.944511	0.38887
120	15.88	15.59	15.735	32.1483	-1.00613	0.365633

## Sheet: PZ23S
P25 loading
Time (min)	0.1 g/L					0.3 g/L					0.5 g/L					0.7 g/L
	Conc. (mg/L)		Average	% Remining	ln(C/Co)	Conc. (mg/L)		Average	% Remining	ln(C/Co)	Conc. (mg/L)		Average	% Remining	ln(C/Co)	Conc. (mg/L)		Average	% Remining	ln(C/Co)
-30	46.3	46.59	46.445	100		46.3	46.59	46.445	100		45.82	46.89	46.355	100		45.82	46.89	46.355	100
0	45.32	45.54	45.43	97.8146	0	45.75	45.2	45.475	97.9115	0	46.11	44.53	45.32	97.7672	0	45.77	45.81	45.79	98.7811	0
15	41.66	42.3	41.98	90.3865	-0.0789794	40.63	40.91	40.77	87.7812	-0.109216	39.27	39.92	39.595	85.4169	-0.135046	40.01	39.97	39.99	86.269	-0.135436
30	39.96	40.39	40.175	86.5002	-0.122928	37.49	37.09	37.29	80.2885	-0.198438	36.73	36.47	36.6	78.9559	-0.2137	36.51	36.86	36.685	79.1393	-0.221698
60	36.01	36.52	36.265	78.0816	-0.22532	32.07	31.81	31.94	68.7695	-0.353304	30.18	29.78	29.98	64.6748	-0.413218	31.66	31.97	31.815	68.6334	-0.364128
90	33.3	33.91	33.605	72.3544	-0.301498	28.28	28.51	28.395	61.1368	-0.47095	25.23	25.05	25.14	54.2336	-0.589288	26.99	26.65	26.82	57.8578	-0.534918
105	32.23	32.25	32.24	69.4154	-0.342965	26.33	27.06	26.695	57.4766	-0.532686	23.6	23.05	23.325	50.3182	-0.664223	25.94	24.53	25.235	54.4386	-0.595834
120	31.64	31.88	31.76	68.382	-0.357965	24.31	24.94	24.625	53.0197	-0.613401	21.12	20.9	21.01	45.3241	-0.76875	22.93	23.26	23.095	49.822	-0.68445
ZSM loading
Time (min)	0.3 g/L					0.5 g/L					0.7 g/L					0.9 g/L
	Conc. (mg/L)		Average	% Remining	ln(C/Co)	Conc. (mg/L)		Average	% Remining	ln(C/Co)	Conc. (mg/L)		Average	% Remining	ln(C/Co)	Conc. (mg/L)		Average	% Remining	ln(C/Co)
-45	46.56	47.08	46.82	100		46.56	47.08	46.82	100		46.56	47.08	46.82	100		46.56	47.08	46.82	100
-15	46.34	46.17	46.255	98.7933		45.48	45.52	45.5	97.1807		44.2	43.87	44.035	94.0517		44	44.18	44.09	94.1692
0	46.06	46.16	46.11	98.4836	0	45.35	45.66	45.505	97.1914	0	44.88	44.06	44.47	94.9808	0	44.45	44.65	44.55	95.1516	0
15	39.77	39.03	39.4	84.1521	-0.157264	38.72	38.64	38.68	82.6143	-0.1625	39.55	39.02	39.285	83.9065	-0.123972	38.96	38.72	38.84	82.956	-0.137162
30	35.25	35.75	35.5	75.8223	-0.261497	37.44	36.69	37.065	79.1649	-0.205149	37.52	37.15	37.335	79.7416	-0.174884	34.85	35.17	35.01	74.7757	-0.240978
60	29.38	29.68	29.53	63.0713	-0.445623	30.78	30.65	30.715	65.6023	-0.393071	30.41	30.15	30.28	64.6732	-0.384327	30.66	30.15	30.405	64.9402	-0.382005
90	24.44	24.01	24.225	51.7407	-0.643645	25.77	25.28	25.525	54.5173	-0.578164	25.91	25.86	25.885	55.2862	-0.541151	25.7	25.87	25.785	55.0726	-0.546819
105	22.48	22.73	22.605	48.2806	-0.712859	23.23	24.01	23.62	50.4485	-0.655728	23.58	23.32	23.45	50.0854	-0.639944	23.11	23.9	23.505	50.2029	-0.639399
120	20.3	20.93	20.615	44.0303	-0.805011	21.34	21.54	21.44	45.7924	-0.752564	21.59	21.44	21.515	45.9526	-0.726064	21.97	22.13	22.05	47.0953	-0.7033
Silica gel loading
Time (min)	0.3 g/L					0.5 g/L					0.7 g/L					0.9 g/L
	Conc. (mg/L)		Average	% Remining	ln(C/Co)	Conc. (mg/L)		Average	% Remining	ln(C/Co)	Conc. (mg/L)		Average	% Remining	ln(C/Co)	Conc. (mg/L)		Average	% Remining	ln(C/Co)
-30	46.62	46.45	46.535	100		46.62	46.45	46.535	100		46.62	46.45	46.535	100		47.96	47.78	47.87	100
0	46.12	45.1	45.61	98.0122	0	44.73	44.33	44.53	95.6914	0	45.39	45.4	45.395	97.5502	0	45.68	45.36	45.52	95.0909	0
15	39.22	39.25	39.235	84.3129	-0.150558	40.95	40.77	40.86	87.8049	-0.0860115	39.74	38.82	39.28	84.4096	-0.144686	39.52	39.28	39.4	82.3062	-0.144386
30	36.08	35.7	35.89	77.1247	-0.239668	36.24	36.33	36.285	77.9736	-0.204759	35.7	35.27	35.485	76.2544	-0.246292	36.64	36.27	36.455	76.1542	-0.222073
60	30.19	30.21	30.2	64.8974	-0.412285	31.77	31.83	31.8	68.3357	-0.336697	30.48	30.5	30.49	65.5206	-0.398003	30.96	30.69	30.825	64.3931	-0.389826
90	26.96	26.96	26.96	57.9349	-0.525773	26.22	26.62	26.42	56.7745	-0.522042	25.58	25.94	25.76	55.3562	-0.566579	26.28	25.93	26.105	54.5331	-0.556025
105	23.83	23.69	23.76	51.0583	-0.652123	24.23	24.44	24.335	52.294	-0.604247	24	23.51	23.755	51.0476	-0.647609	24	24.24	24.12	50.3865	-0.63511
120	22.13	22.62	22.375	48.0821	-0.712183	22.18	21.99	22.085	47.4589	-0.701264	20.87	20.86	20.865	44.8372	-0.777329	22	22.06	22.03	46.0205	-0.725747
Optimum		0.5P:0.3Z23:0.3S
Time (min)	Conc. (mg/L)		Average	% Remining	ln(C/Co)	C/Co
-45	46.84	46.93	46.885	100
-15	46.5	46.4	46.45	99.0722
0	46.19	46.61	46.4	98.9656	0	1
15	41.52	41.43	41.475	88.4611	-0.112209	0.893858
30	37.13	37.55	37.34	79.6417	-0.217234	0.804741
60	31.85	32.11	31.98	68.2094	-0.372189	0.689224
90	26.92	26.93	26.925	57.4277	-0.544244	0.58028
105	24.7	24.84	24.77	52.8314	-0.627666	0.533836
120	22.09	22.45	22.27	47.4992	-0.734059	0.479957

## Sheet: PZS60Å
P25 loading
Time (min)	0.1 g/L					0.3 g/L					0.5 g/L					0.7 g/L
	Conc. (mg/L)		Average	% Remining	ln(C/Co)	Conc. (mg/L)		Average	% Remining	ln(C/Co)	Conc. (mg/L)		Average	% Remining	ln(C/Co)	Conc. (mg/L)		Average	% Remining	ln(C/Co)
-30	47.21	47.31	47.26	100		47.21	47.31	47.26	100		47.21	47.31	47.26	100		47.21	47.31	47.26	100
0	39.41	39.44	39.425	83.4215	0	41.32	41.15	41.235	87.2514	0	41.1	41	41.05	86.8599	0	40.88	40.81	40.845	86.4262	0
15	36.12	36.82	36.47	77.1689	-0.0779101	35.49	35.58	35.535	75.1904	-0.148769	35.45	35.47	35.46	75.0317	-0.146386	35.52	35.49	35.505	75.127	-0.140111
30	34.07	34.25	34.16	72.281	-0.143345	33.32	33.44	33.38	70.6306	-0.21133	31.48	31.11	31.295	66.2188	-0.271332	33.58	33.32	33.45	70.7787	-0.199733
60	30.37	29.88	30.125	63.7431	-0.269045	27.7	27.59	27.645	58.4956	-0.399843	25.62	25.54	25.58	54.1261	-0.47298	27.46	27.64	27.55	58.2945	-0.393782
90	28.53	28.28	28.405	60.1037	-0.327835	23.18	23.28	23.23	49.1536	-0.573843	21.04	21.26	21.15	44.7524	-0.663151	22.71	22.71	22.71	48.0533	-0.586979
105	26.09	26.65	26.37	55.7977	-0.402173	21.1	21.18	21.14	44.7313	-0.66812	18.83	18.83	18.83	39.8434	-0.779339	20.71	20.11	20.41	43.1866	-0.693759
120	26.18	26	26.09	55.2052	-0.412848	19.39	19.53	19.46	41.1765	-0.750926	16.54	16.64	16.59	35.1037	-0.905991	18.31	18.56	18.435	39.0076	-0.795533
ZSM loading
Time (min)	0.1 g/L					0.3 g/L					0.5 g/L					0.7 g/L
	Conc. (mg/L)		Average	% Remining	ln(C/Co)	Conc. (mg/L)		Average	% Remining	ln(C/Co)	Conc. (mg/L)		Average	% Remining	ln(C/Co)	Conc. (mg/L)		Average	% Remining	ln(C/Co)
-45	47.54	47.95	47.745	100		47.54	47.95	47.745	100		46.92	47.45	47.185	100		46.92	47.45	47.185	100
-15	45.38	45.64	45.51	95.3189		41.97	41.62	41.795	87.538		40.54	40.05	40.295	85.3979		38.06	38.27	38.165	80.8838
0	45.5	45.58	45.54	95.3817	0	42.26	42.15	42.205	88.3967	0	39.92	40.14	40.03	84.8363	0	38.37	38.62	38.495	81.5831	0
15	39.93	39.22	39.575	82.8883	-0.140393	38.43	38.25	38.34	80.3016	-0.096045	35.64	35.3	35.47	75.1722	-0.120942	34.19	34.37	34.28	72.6502	-0.115966
30	36.56	36.48	36.52	76.4897	-0.220731	34.71	34.61	34.66	72.594	-0.196952	32.55	32.71	32.63	69.1533	-0.204397	30.65	30.68	30.665	64.9889	-0.227406
60	30.26	30.73	30.495	63.8706	-0.401028	29.39	29.27	29.33	61.4305	-0.363928	26.76	26.84	26.8	56.7977	-0.401227	25.14	25.22	25.18	53.3644	-0.424478
90	26.13	26.82	26.475	55.4508	-0.54239	24.02	23.77	23.895	50.0471	-0.568869	22	22.19	22.095	46.8263	-0.594278	21.32	21.29	21.305	45.1521	-0.591587
105	24.58	24.05	24.315	50.9268	-0.627498	22.01	22.57	22.29	46.6855	-0.638401	20.33	20.62	20.475	43.393	-0.670425	19.11	18.81	18.96	40.1823	-0.708197
120	21.94	21.25	21.595	45.2299	-0.746129	19.51	19.94	19.725	41.3132	-0.760652	18.7	18.59	18.645	39.5147	-0.764051	17.3	17.43	17.365	36.8019	-0.796072
Silica gel loading
Time (min)	0.3 g/L					0.5 g/L					0.7 g/L					0.9 g/L
	Conc. (mg/L)		Average	% Remining	ln(C/Co)	Conc. (mg/L)		Average	% Remining	ln(C/Co)	Conc. (mg/L)		Average	% Remining	ln(C/Co)	Conc. (mg/L)		Average	% Remining	ln(C/Co)
-30	46.92	47.19	47.055	100		46.1	46.93	46.515	100		46.1	46.93	46.515	100		47.05	47.33	47.19	100
0	40.97	40.87	40.92	86.9621	0	40.36	40.62	40.49	87.0472	0	40.49	40.27	40.38	86.8107	0	40.56	40.03	40.295	85.3889	0
15	35.07	35.75	35.41	75.2524	-0.144625	34.85	34.73	34.79	74.7931	-0.151725	36.52	36.3	36.41	78.2758	-0.103491	35.48	35.11	35.295	74.7934	-0.132486
30	31.69	32.06	31.875	67.7399	-0.249797	31.42	31.4	31.41	67.5266	-0.253929	32.35	32.49	32.42	69.6979	-0.219559	32.21	32.49	32.35	68.5527	-0.219613
60	26.16	25.87	26.015	55.2864	-0.452946	25.44	25.42	25.43	54.6705	-0.465125	26.61	26.74	26.675	57.3471	-0.414608	26.79	26.53	26.66	56.495	-0.413063
90	21.08	21.21	21.145	44.9368	-0.660215	20.95	21.27	21.11	45.3832	-0.651308	21.93	21.69	21.81	46.8881	-0.615966	20.44	20.45	20.445	43.3249	-0.678489
105	19.23	19.71	19.47	41.3771	-0.742744	18.89	18.66	18.775	40.3633	-0.768529	20.53	20.19	20.36	43.7708	-0.684762	19.87	19.68	19.775	41.9051	-0.711809
120	16.69	16.35	16.52	35.1079	-0.907047	16.79	16.88	16.835	36.1926	-0.877595	18.35	18.31	18.33	39.4066	-0.789796	17.58	17.19	17.385	36.8404	-0.84062
Optimum		0.5P:0.3Z:0.3S60
Time (min)	Conc. (mg/L)		Average	% Remining	ln(C/Co)	C/Co
-45	47.38	47.55	47.465	100
-15	44.6	44.2	44.4	93.5426
0	44.21	44.56	44.385	93.511	0	1
15	37.86	38.1	37.98	80.0169	-0.155842	0.855694
30	33.5	33.97	33.735	71.0734	-0.274366	0.760054
60	28.99	29.25	29.12	61.3505	-0.421476	0.656078
90	24.6	24.39	24.495	51.6064	-0.594433	0.551876
105	22.05	22.03	22.04	46.4342	-0.700043	0.496564
120	19.57	19.83	19.7	41.5043	-0.812283	0.443844

## Sheet: PZS40-60 µm
P25 loading
Time (min)	0.1 g/L					0.3 g/L					0.5 g/L					0.7 g/L
	Conc. (mg/L)		Average	% Remining	ln(C/Co)	Conc. (mg/L)		Average	% Remining	ln(C/Co)	Conc. (mg/L)		Average	% Remining	ln(C/Co)	Conc. (mg/L)		Average	% Remining	ln(C/Co)
-30	47.62	47.64	47.63	100		47.62	47.64	47.63	100		47.62	47.64	47.63	100		47.67	47.3	47.485	100
0	41.54	41.14	41.34	86.794	0	41.2	41.63	41.415	86.9515	0	41.03	41.29	41.16	86.4161	0	41.63	41.59	41.61	87.6277	0
15	36.68	36.65	36.665	76.9788	-0.120008	36.68	36.09	36.385	76.3909	-0.129487	35.02	35.21	35.115	73.7245	-0.158839	35.33	35.8	35.565	74.8973	-0.156979
30	34.72	34.55	34.635	72.7168	-0.176966	33.29	33.17	33.23	69.767	-0.22019	32.46	32.09	32.275	67.7619	-0.243174	31.23	31.56	31.395	66.1156	-0.281692
60	30.46	30.96	30.71	64.4762	-0.297242	27.61	27.14	27.375	57.4743	-0.414013	26.67	26.57	26.62	55.8891	-0.435804	25.88	25.57	25.725	54.175	-0.480877
90	28.6	28.26	28.43	59.6893	-0.374386	24.42	24.23	24.325	51.0708	-0.532139	21.68	21.66	21.67	45.4965	-0.641538	21.87	21.41	21.64	45.5723	-0.653797
105	26.99	27.01	27	56.687	-0.425994	21.97	22.18	22.075	46.3468	-0.629197	19.69	19.62	19.655	41.266	-0.739135	19.19	19.45	19.32	40.6865	-0.7672
120	26.09	25.87	25.98	54.5455	-0.464504	20.13	19.88	20.005	42.0008	-0.727661	17.67	17.74	17.705	37.172	-0.84362	16.84	16.96	16.9	35.5902	-0.901027
ZSM loading
Time (min)	0.1 g/L					0.3 g/L					0.5 g/L					0.7 g/L
	Conc. (mg/L)		Average	% Remining	ln(C/Co)	Conc. (mg/L)		Average	% Remining	ln(C/Co)	Conc. (mg/L)		Average	% Remining	ln(C/Co)	Conc. (mg/L)		Average	% Remining	ln(C/Co)
-45	47.67	47.3	47.485	100		47.2	47.59	47.395	100		47.2	47.59	47.395	100		47.2	47.59	47.395	100
-15	46.05	46.28	46.165	97.2202		43.7	43.9	43.8	92.4148		41.04	41.17	41.105	86.7286		40.35	39.1	39.725	83.8169
0	46.09	45.84	45.965	96.799	0	43.86	43.94	43.9	92.6258	0	41.32	41.33	41.325	87.1927	0	39.3	39.07	39.185	82.6775	0
15	38.8	39.03	38.915	81.9522	-0.1665	37.01	37.01	37.01	78.0884	-0.170726	35.71	35.95	35.83	75.5987	-0.142682	33.2	33.88	33.54	70.767	-0.155555
30	35.77	35.44	35.605	74.9816	-0.255394	33.11	33.22	33.165	69.9757	-0.280419	32.22	32.02	32.12	67.7709	-0.251989	30.98	31.1	31.04	65.4921	-0.233017
60	29.46	29.59	29.525	62.1775	-0.442643	28.8	28.87	28.835	60.8398	-0.420324	26.82	27.01	26.915	56.7887	-0.428784	25.31	25.55	25.43	53.6554	-0.432364
90	25.42	25	25.21	53.0904	-0.600639	23.95	24.38	24.165	50.9864	-0.597009	21.74	22.22	21.98	46.3762	-0.631335	20.77	20.14	20.455	43.1586	-0.650067
105	22.68	23.05	22.865	48.152	-0.698273	21.87	22.28	22.075	46.5766	-0.687469	20.04	20.04	20.04	42.2829	-0.723737	18.76	18.87	18.815	39.6983	-0.73364
120	20.51	20.68	20.595	43.3716	-0.802832	19.58	19.92	19.75	41.6711	-0.798761	18.12	18.12	18.12	38.2319	-0.824451	16.48	16.78	16.63	35.0881	-0.857086
Silica gel loading
Time (min)	0.1 g/L					0.3 g/L					0.5 g/L					0.7 g/L					0.9 g/L
	Conc. (mg/L)		Average	% Remining	ln(C/Co)	Conc. (mg/L)		Average	% Remining	ln(C/Co)	Conc. (mg/L)		Average	% Remining	ln(C/Co)	Conc. (mg/L)		Average	% Remining	ln(C/Co)	Conc. (mg/L)		Average	% Remining	ln(C/Co)
-30	48.16	48.79	48.475	100		46.99	47.46	47.225	100		47.31	47.75	47.53	100		47.31	47.75	47.53	100		47.55	47.38	47.465	100
0	41.73	41.64	41.685	85.9928	0	41.7	41.77	41.735	88.3748	0	41.67	41.22	41.445	87.1976	0	41.56	41.74	41.65	87.6289	0	41.61	41.1	41.355	87.1274	0
15	36.33	36.35	36.34	74.9665	-0.137222	35.81	35.38	35.595	75.3732	-0.159135	35.43	35.41	35.42	74.5214	-0.157091	34.97	34.9	34.935	73.5009	-0.175812	35.66	35.68	35.67	75.1501	-0.147883
30	33.6	33.53	33.565	69.2419	-0.216657	31.9	32.03	31.965	67.6866	-0.266699	30.27	30.01	30.14	63.4126	-0.318514	30.9	30.95	30.925	65.0642	-0.297736	32.34	32.15	32.245	67.9343	-0.24883
60	28.11	27.68	27.895	57.5451	-0.401694	25.96	25.81	25.885	54.8121	-0.477676	26	25.77	25.885	54.4603	-0.470704	26.34	26.37	26.355	55.4492	-0.457643	26.55	26.48	26.515	55.8622	-0.444483
90	23.24	22.91	23.075	47.6019	-0.591392	21.16	21.5	21.33	45.1668	-0.671226	21.63	21.03	21.33	44.8769	-0.664253	21.41	21.23	21.32	44.8559	-0.669656	21.31	21.94	21.625	45.5599	-0.648343
105	21.14	20.77	20.955	43.2285	-0.687764	18.8	19.16	18.98	40.1906	-0.787954	19.34	19.29	19.315	40.6375	-0.763485	19.19	19.25	19.22	40.4376	-0.77335	19.43	19.82	19.625	41.3463	-0.745389
120	18.82	18.57	18.695	38.5663	-0.801885	17.09	16.67	16.88	35.7438	-0.905211	17.54	17.42	17.48	36.7768	-0.86331	17.53	17.56	17.545	36.9135	-0.864532	18.02	17.84	17.93	37.7752	-0.835718
Optimum		0.5P25:0.3Z:0.3S40-60
Time (min)	Conc. (mg/L)		Average	% Remining	ln(C/Co)	C/Co
-45	49.72	49.57	49.645	100
-15	45.6	45.7	45.65	91.9529
0	45.46	45.75	45.605	91.8622	0	1
15	40.19	40.03	40.11	80.7936	-0.128392	0.879509
30	36.66	36.26	36.46	73.4414	-0.223802	0.799474
60	31.35	31.52	31.435	63.3196	-0.372095	0.689288
90	26.02	26.33	26.175	52.7243	-0.555213	0.57395
105	22.11	22.6	22.355	45.0297	-0.712967	0.490187
120	20.3	20.47	20.385	41.0615	-0.805218	0.44699

## Sheet: PZSB
P25 loading
Time (min)	0.1 g/L					0.3 g/L					0.5 g/L					0.7 g/L					0.9 g/L
	Conc. (mg/L)		Average	% Remining	ln(C/Co)	Conc. (mg/L)		Average	% Remining	ln(C/Co)	Conc. (mg/L)		Average	% Remining	ln(C/Co)	Conc. (mg/L)		Average	% Remining	ln(C/Co)	Conc. (mg/L)		Average	% Remining	ln(C/Co)
-45	48.3	48.57	48.435	100		48.3	48.57	48.435	100		48.3	48.57	48.435	100		48.3	48.57	48.435	100		47.93	48.35	48.14	100
-30	36.57	36.68	36.625	75.6168		36.98	36.97	36.975	76.3394		36.68	36.84	36.76	75.8955		36.39	36.03	36.21	74.76		36	36.1	36.05	74.8857
0	37.02	36.5	36.76	75.8955	0	36.01	36.68	36.345	75.0387	0	36.3	36.54	36.42	75.1936	0	36.81	36.72	36.765	75.9059	0	36.81	36.27	36.54	75.9036	0
15	32.93	33.22	33.075	68.2874	-0.105633	31.78	31.96	31.87	65.7995	-0.131392	30.81	30.98	30.895	63.7865	-0.164524	30.74	30.74	30.74	63.4665	-0.178982	31.6	31.44	31.52	65.4757	-0.147785
30	30.4	30.68	30.54	63.0536	-0.185373	28.85	28.73	28.79	59.4405	-0.233029	27.87	27.59	27.73	57.252	-0.272603	27.28	27.68	27.48	56.7358	-0.291088	28.27	28.84	28.555	59.3166	-0.246575
45	29.1	29.45	29.275	60.4418	-0.227676	26.27	26.96	26.615	54.9499	-0.311582	25.7	25.65	25.675	53.0092	-0.3496	25.41	25.8	25.605	52.8647	-0.361759	26.02	26.32	26.17	54.3623	-0.333794
60	27.9	27.09	27.495	56.7668	-0.290406	24.74	24.79	24.765	51.1304	-0.383625	24.05	23.75	23.9	49.3445	-0.42124	23.53	23.33	23.43	48.3741	-0.450529	24.13	24.12	24.125	50.1143	-0.415159
75	26.84	27.08	26.96	55.6622	-0.310056	22.73	22.71	22.72	46.9082	-0.469811	22.35	22.29	22.32	46.0824	-0.489635	21.59	21.48	21.535	44.4616	-0.534867	22.36	22.09	22.225	46.1674	-0.49719
90	25.34	25.63	25.485	52.6169	-0.36632	22.03	22.27	22.15	45.7314	-0.495219	20.81	20.91	20.86	43.068	-0.557285	19.89	20.23	20.06	41.4163	-0.605819	20.67	20.44	20.555	42.6984	-0.575303
105	24.47	23.93	24.2	49.9639	-0.418058	21.33	20.93	21.13	43.6255	-0.542363	19.23	19.1	19.165	39.5685	-0.642032	18.31	18.41	18.36	37.9065	-0.694372	18.25	18.45	18.35	38.118	-0.688778
120	23.11	23.82	23.465	48.4464	-0.4489	19.98	20.02	20	41.2925	-0.597324	17.51	17.64	17.575	36.2857	-0.728641	16.24	16.59	16.415	33.8908	-0.806351	16.54	16.7	16.62	34.5243	-0.787801
ZSM loading
Time (min)	0.1 g/L					0.3 g/L					0.5 g/L					0.7 g/L					0.9 g/L
	Conc. (mg/L)		Average	% Remining	ln(C/Co)	Conc. (mg/L)		Average	% Remining	ln(C/Co)	Conc. (mg/L)		Average	% Remining	ln(C/Co)	Conc. (mg/L)		Average	% Remining	ln(C/Co)	Conc. (mg/L)		Average	% Remining	ln(C/Co)
-45	47.71	47.01	47.36	100		48	48.21	48.105	100		48.92	48.66	48.79	100		48	48.21	48.105	100		47.5	47.46	47.48	100
-30	44.66	45.03	44.845	94.6896		44.79	45.09	44.94	93.4206		42.8	42	42.4	86.9031		39.44	39.98	39.71	82.5486		38.2	38.36	38.28	80.6234
0	43.56	43.9	43.73	92.3353	0	44.41	43.9	44.155	91.7888	0	42.2	42.39	42.295	86.6878	0	39.67	40.11	39.89	82.9228	0	38	38.4	38.2	80.4549	0
15	40.74	39.64	40.19	84.8606	-0.0844162	39.42	39.46	39.44	81.9873	-0.112926	37.64	37.71	37.675	77.2187	-0.115672	34.48	34.56	34.52	71.7597	-0.144587	33.68	33.58	33.63	70.8298	-0.127417
30	37.11	37.88	37.495	79.1702	-0.153827	35.4	35.24	35.32	73.4227	-0.223257	35.17	35.18	35.175	72.0947	-0.184333	31.84	31.94	31.89	66.2925	-0.223833	31.22	30.94	31.08	65.4591	-0.206271
45	35.85	35.6	35.725	75.4329	-0.202184	33.87	34.05	33.96	70.5956	-0.262523	33.535	33.69	33.6125	79.2748	-0.114099	30.12	30.41	30.265	62.9145	-0.276134	29.36	29.435	29.3975	61.9155	-0.261926
60	33.91	34.03	33.97	71.7272	-0.252557	32.25	31.57	31.91	66.3341	-0.324787	31.9	32.2	32.05	75.7773	-0.0930384	28.76	29	28.88	60.0353	-0.322976	27.5	27.93	27.715	58.3719	-0.320862
75	31.5	31.87	31.685	66.9024	-0.322191	30.89	29.65	30.27	62.9249	-0.377549	30.585	30.595	30.59	81.1944	-0.0942249	27.83	27.04	27.435	57.0315	-0.374306	26.1	26.44	26.27	55.3286	-0.374408
90	30.81	31.77	31.29	66.0684	-0.334736	29.15	29.8	29.475	61.2722	-0.404164	29.27	28.99	29.13	59.7049	-0.3729	26.21	26	26.105	54.2667	-0.423999	24.7	24.95	24.825	52.2852	-0.430984
105	29.76	29.89	29.825	62.9751	-0.382687	28.13	27.97	28.05	58.3099	-0.453718	27.93	27.83	27.88	57.1429	-0.416759	24.14	23.92	24.03	49.9532	-0.506823	23.59	23.62	23.605	49.7157	-0.481377
120	28.85	28.87	28.86	60.9375	-0.415578	26.53	26.87	26.7	55.5036	-0.503043	26.78	26.7	26.74	54.8063	-0.458508	22.54	22.06	22.3	46.3569	-0.581539	22.06	22.47	22.265	46.8934	-0.53982
Silica gel loading
Time (min)	0.1 mg/L					0.3 mg/L					0.7 g/L
	Conc. (mg/L)		Average	% Remining	ln(C/Co)	Conc. (mg/L)		Average	% Remining	ln(C/Co)	Conc. (mg/L)		Average	% Remining	ln(C/Co)
-45	49.68	48.62	49.15	100		49.68	48.62	49.15	100		49.68	48.62	49.15	100
-30	42.07	42.38	42.225	85.9105		43.56	40.79	42.175	85.8087		42.78	42.53	42.655	86.7854
0	42.71	41.98	42.345	86.1546	0	42.06	42.4	42.23	85.9207	0	42.66	42.88	42.77	87.0193	0
15	38.79	39.41	39.1	79.5524	-0.0797279	38.78	38.32	38.55	78.4334	-0.0911748	37.91	37.82	37.865	77.0397	-0.12181
30	35.83	36.38	36.105	73.4588	-0.159419	34.86	35.08	34.97	71.1495	-0.18864	35.92	36.1	36.01	73.2655	-0.17204
45	34.97	34.17	34.57	70.3357	-0.202864	33.35	33.45	33.4	67.9552	-0.234575	32.9	33.61	33.255	67.6602	-0.251632
60	33.57	33.57	33.57	68.3011	-0.232218	32.15	32.4	32.275	65.6663	-0.268838	32.42	31.61	32.015	65.1373	-0.289632
75	32.11	32.39	32.25	65.6155	-0.272332	29.42	29.17	29.295	59.6033	-0.365714	30.21	30.06	30.135	61.3123	-0.35015
90	30.97	31.44	31.205	63.4893	-0.305272	28.51	28.37	28.44	57.8637	-0.395334	29.81	29.5	29.655	60.3357	-0.366206
105	31.01	29.93	30.47	61.9939	-0.329108	27.17	27.08	27.125	55.1882	-0.442675	28.28	27.64	27.96	56.8871	-0.425062
120	28.17	28.51	28.34	57.6602	-0.401576	24.85	25.29	25.07	51.0071	-0.521459	26.81	26.78	26.795	54.5168	-0.467622
Binder loading
Time (min)	0.25 g/L					0.5 g/L					0.75 g/L					1.25 g/L
	Conc. (mg/L)		Average	% Remining	ln(C/Co)	Conc. (mg/L)		Average	% Remining	ln(C/Co)	Conc. (mg/L)		Average	% Remining	ln(C/Co)	Conc. (mg/L)		Average	% Remining	ln(C/Co)
-45	48.57	48.27	48.42	100		48.57	48.4	48.485	100		48.57	48.4	48.485	100		48.92	48.66	48.79	100
-30	41.71	42.43	42.07	86.8856		42.32	42.09	42.205	87.0475		42.18	42.6	42.39	87.4291		42.5	42.64	42.57	87.2515
0	42	42.6	42.3	87.3606	0	41.9	42.6	42.25	87.1404	0	42	42.8	42.4	87.4497	0	42.8	42.4	42.6	87.313	0
15	36.57	36.37	36.47	75.3201	-0.148297	36.8	37.25	37.025	76.3638	-0.132011	37.73	38.09	37.91	78.1891	-0.111933	37.86	37.67	37.765	77.4032	-0.120472
30	34.28	34.42	34.35	70.9418	-0.208185	35	35.79	35.395	73.002	-0.177034	35.28	35.46	35.37	72.9504	-0.181284	36.67	36.88	36.775	75.3741	-0.147036
45	31.15	31.47	31.31	64.6634	-0.30085	33.37	33.87	33.62	69.341	-0.228483	33.04	33.78	33.41	68.9079	-0.238293	35.28	35.65	35.465	72.6891	-0.183308
60	29.86	30.37	30.115	62.1954	-0.339764	32.22	32.06	32.14	66.2885	-0.273503	31.97	31.41	31.69	65.3604	-0.291147	33.77	33.18	33.475	68.6104	-0.241055
75	26.68	26.67	26.675	55.0909	-0.46106	29.94	29.19	29.565	60.9776	-0.357013	29.4	30.03	29.715	61.287	-0.355496	32.64	32.12	32.38	66.3661	-0.274313
90	25.94	25.6	25.77	53.2218	-0.495576	27.63	27.79	27.71	57.1517	-0.421811	28.19	28.12	28.155	58.0695	-0.409423	31.3	31.51	31.405	64.3677	-0.304887
105	23.57	23.87	23.72	48.988	-0.578469	26.68	27.16	26.92	55.5223	-0.450735	26.11	26.27	26.19	54.0167	-0.481771	30.76	30.47	30.615	62.7485	-0.330364
120	22.8	22.88	22.84	47.1706	-0.616274	25.42	25.92	25.67	52.9442	-0.498281	24.05	24.82	24.435	50.397	-0.551132	28.29	28.82	28.555	58.5263	-0.400022
Optimum	0.7:0.7:0.3:0.25
Time (min)	Conc. (mg/L)		Average	% Remining	ln(C/Co)	C/Co
-45	48.8	47.04	47.92	100
-15	37.49	38.95	38.22	79.7579
0	38.22	38.42	38.32	79.9666	0	1
15	33.68	33.12	33.4	69.6995	-0.137416	0.871608
30	30.7	31.22	30.96	64.6077	-0.213276	0.807933
60	25.23	24.76	24.995	52.1598	-0.427296	0.65227
90	21.1	21.83	21.465	44.7934	-0.579548	0.560151
105	19.5	20.07	19.785	41.2876	-0.661048	0.51631
120	17.72	17.91	17.815	37.1765	-0.765931	0.464901

## Sheet: Photocatalytic ozonation
Sulfamethoxazole disappearance
Time (min)	UV					P25/UV					PZS/UV
	Conc. (mg/L)		Average	C/Co	ln(C/Co)	Conc. (mg/L)		Average	C/Co	ln(C/Co)	Conc. (mg/L)		Average	C/Co	ln(C/Co)
-5	95.12	93.73	94.425			96.65	96.95	96.8			96.63	96.84	96.735
0	94.12	92.01	93.065	1	0	91.68	91.55	91.615	1	0	87.02	87.14	87.08	1	0
5	91.96	90.79	91.375	0.981841	-0.0183263	88.83	88.82	88.825	0.969546	-0.0309269	80.24	80.32	80.28	0.921911	-0.0813067
10	93.04	92.51	92.775	0.996884	-0.00312097	84.86	84.47	84.665	0.924139	-0.0788927	75.69	75.66	75.675	0.869028	-0.140379
15	93.63	91.92	92.775	0.996884	-0.00312097	82.12	82.75	82.435	0.899798	-0.105585	70.57	70.72	70.645	0.811266	-0.20916
20	90.44	90.64	90.54	0.972868	-0.0275064	77.72	79.2	78.46	0.85641	-0.155006	67.92	67.89	67.905	0.7798	-0.248718
25	89.65	90.41	90.03	0.967388	-0.0331552	75.51	75.14	75.325	0.822191	-0.195783	64.67	64.94	64.805	0.744201	-0.295444
30	90.75	86.64	88.695	0.953044	-0.0480947	73.01	73.62	73.315	0.800251	-0.22283	59.64	60.2	59.92	0.688103	-0.373817
40	87.7	90.13	88.915	0.955408	-0.0456173	68.47	68.8	68.635	0.749168	-0.288792	55	55.13	55.065	0.63235	-0.458313
50	89.5	86.97	88.235	0.948101	-0.0532945	63.9	64.22	64.06	0.69923	-0.357775	50.45	50.31	50.38	0.578548	-0.547233
60	88.12	88.31	88.215	0.947886	-0.0535212	58.34	58.35	58.345	0.63685	-0.451221	46.08	46.06	46.07	0.529054	-0.636665
Time (min)	O3					O3/UV
	Conc. (mg/L)		Average	C/Co	ln(C/Co)	Conc. (mg/L)		Average	C/Co	ln(C/Co)
-5	94.47	94.88	94.675			94.03	94.31	94.17
0	93.06	93.48	93.27	1	0	93.97	93.75	93.86	1	0
2	62.28	62.59	62.435	0.669401	-0.401372	66.59	66.76	66.675	0.710367	-0.341974
4	39.91	40.07	39.99	0.428755	-0.846869	46.59	46.47	46.53	0.495738	-0.701707
6	31.7	31.55	31.625	0.339069	-1.08155	30.48	30.56	30.52	0.325165	-1.12342
8	22.39	22.27	22.33	0.239412	-1.42957	19.08	18.97	19.025	0.202696	-1.59605
10	13.68	14.08	13.88	0.148815	-1.90505	11.2	10.98	11.09	0.118155	-2.13576
12	8.31	8.13	8.22	0.0881312	-2.42893	4.77	4.81	4.79	0.0510335	-2.97527
14	3.82	3.86	3.84	0.0411708	-3.19003	0.81	0.81	0.81	0.00862987	-4.75253
16	1.25	1.14	1.195	0.0128123	-4.35735	0	0	0	0	#NUM!
18	0	0	0	0	#NUM!	0	0	0	0	#NUM!
20	0	0	0	0	#NUM!	0	0	0	0	#NUM!
25	0	0	0	0	#NUM!	0	0	0	0	#NUM!
Time (min)	P25/O3/UV
	Conc. (mg/L)		Average	C/Co	ln(C/Co)
-5	96.32	98.89	97.605
0	93.27	93.48	93.375	1	0
1	69.54	69.45	69.495	0.744257	-0.295369
2	58.61	58.98	58.795	0.629665	-0.462567
3	45.67	45.56	45.615	0.488514	-0.716387
4	36.13	36.58	36.355	0.389344	-0.943292
5	27.275	27.97	27.6225	0.295823	-1.21799
6	22.91	23.19	23.05	0.246854	-1.39896
7	18.09	18.03	18.06	0.193414	-1.64292
8	13.35	13.25	13.3	0.142436	-1.94886
9	9.7	9.87	9.785	0.104793	-2.25577
10	5.82	5.68	5.75	0.0615797	-2.78742
12	2.61	2.52	2.565	0.0274699	-3.59467
14	0	0	0	0	#NUM!
Time (min)	PZS/O3/UV
	Conc. (mg/L)		Average	C/Co	ln(C/Co)
-5	95.98	96.2	96.09
0	89.01	89.1	89.055	1	0
1	61.73	59.78	60.755	0.682219	-0.382405
2	46.18	46.18	46.18	0.518556	-0.656707
3	33.32	33.46	33.39	0.374937	-0.980998
4	24.97	24.86	24.915	0.279771	-1.27378
5	15.36	15.17	15.265	0.171411	-1.76369
6	11.98	11.83	11.905	0.133681	-2.0123
7	7.48	7.48	7.48	0.083993	-2.47702
8	4.13	4.16	4.145	0.0465443	-3.06735
9	1.06	1.03	1.045	0.0117343	-4.44524
10	0.22	0.23	0.225	0.00252653	-5.98091
11	0.13	0.11	0.12	0.00134748	-6.60952
12	0	0	0	0	#NUM!
Sulfamethoxazole mineralization
Time (min)	UV						O3						O3/UV						P25/UV						P25/O3/UV						PZS/UV						PZS/O3/UV
	Conc (mgC/L)		Average	% Remining	C/Co	ln(C/Co)	Conc (mgC/L)		Average	% Remining	C/Co	ln(C/Co)	Conc (mgC/L)		Average	% Remining	C/Co	ln(C/Co)	Conc (mgC/L)		Average	% Remining	C/Co	ln(C/Co)	Conc (mgC/L)		Average	% Remining	C/Co	ln(C/Co)	Conc (mgC/L)		Average	% Remining	C/Co	ln(C/Co)	Conc (mgC/L)		Average	% Remining	C/Co	ln(C/Co)
0	47	46.3611	46.6805	100	1	0	47	46.3611	46.6805	100	1	0	45.102	45.6469	45.3745	100	1	0	45.5342	46.0416	45.7879	100	1	0	45.62	45.95	45.785	100	1	0	48.37	48.37	48.37	100	1	0	43.71	44.38	44.045	100	1	0
30	46.9812	45.4778	46.2295	99.0338	0.990338	-0.00970881	43.5234	45.1395	44.3315	94.9678	0.949678	-0.0516324	39.7649	39.6146	39.6897	87.4715	0.874715	-0.133857	42.3958	43.6737	43.0348	93.9873	0.939873	-0.0620108	37.35	37.51	37.43	81.7517	0.817517	-0.201484	43	42.8	42.9	88.6913	0.886913	-0.120008	31.19	34.68	32.935	74.7758	0.747758	-0.290676
60	47.451	45.102	46.2765	99.1345	0.991345	-0.00869307	43.1851	44.2751	43.7301	93.6795	0.936795	-0.0652903	37.0964	36.3822	36.7393	80.9691	0.809691	-0.211102	39.1072	41.6629	40.385	88.2003	0.882003	-0.12556	27.07	26.89	26.98	58.9276	0.589276	-0.528861	36	47.46	41.73	86.2725	0.862725	-0.147659	23.84	23.66	23.75	53.9221	0.539221	-0.617629
90	47.3571	45.2899	46.3235	99.2351	0.992351	-0.00767836	42.5462	43.4106	42.9784	92.0692	0.920692	-0.0826292	36.4198	35.8185	36.1192	79.6024	0.796024	-0.228126	39.4078	38.1299	38.7689	84.6706	0.846706	-0.166401	21.48	19.46	20.47	44.709	0.44709	-0.804996	41.17	40.26	40.715	84.1741	0.841741	-0.172283	17.15	17.02	17.085	38.7899	0.387899	-0.947011
120	47.1691	45.2899	46.2295	99.0338	0.990338	-0.00970881	42.0952	41.6629	41.879	89.7142	0.897142	-0.108541	34.8413	34.2399	34.5406	76.1234	0.761234	-0.272814	36.1755	38.393	37.2843	81.4283	0.814283	-0.205448	15.98	15.48	15.73	34.3562	0.343562	-1.06839	41.5	37	39.25	81.1453	0.811453	-0.208928	11.63	12.46	12.045	27.347	0.27347	-1.29656
